# Supplementary material for: Sheathless elasto-inertial particle focusing and continuous separation in a straight rectangular microchannel
Source: Royal Society of Chemistry journal article supplement (doi:10.1039/c0lc00102c), 2010-10-26
Supplement: c0lc00102c.pdf [file c0lc00102c.pdf]

# **“Sheathless Elasto-Inertial Particle Focusing and Continuous Separation in a Straight Rectangular Microchannel”**

*Electronic Supplementary Information*

**by Seungyoung Yang<sup>1</sup>, Jae Young Kim<sup>1</sup>, Seong Jae Lee<sup>2</sup>, Sung Sik Lee<sup>3,\*</sup>,  
and Ju Min Kim<sup>1,\*</sup>**

<sup>1</sup>*Department of Chemical Engineering, Ajou University,  
Suwon 443-749, Republic of Korea*

<sup>2</sup>*Department of Polymer Engineering, The University of Suwon,  
Hwaseong, Gyeonggi 445-743 Republic of Korea*

<sup>3</sup>*Institute of Biochemistry, ETH Zurich, Zurich, CH 4055, Switzerland*

*\*To whom correspondence should be addressed.*

*\*<sup>1</sup>E-mail: jumin@ajou.ac.kr; Fax: +82-31-219-1612; Tel: +82-31-219-2475  
or*

*\*<sup>3</sup>E-mail: leesu@ethz.ch; Fax: +41-44-633-1228; Tel: +41-44-633-4430*

**Submitted: June 14, 2010**

**Revised: August 26, 2010**

## List of Supplementary Information

**SI Fig. S1. Side view of particle (diameter = 5.9  $\mu\text{m}$ ) distribution in viscoelastic fluid (0.05wt% PEO).** It reveals out Elasto-Inertial focusing in three-dimension. The size of channel is 50  $\mu\text{m}$

**SI Fig. S2. Smaller particle (2.4  $\mu\text{m}$ ) distribution in non-Newtonian fluid (0.05wt% PEO).** The focusing efficiency is weaker than larger particles (5.9  $\mu\text{m}$ ) at same flow rate (refer to Figure 3(a))

**SI Table 1. Dimensionless number in experimental condition for PVP solution**

**SI Table 2. Dimensionless number in experimental condition for PEO solutions.**

The viscosities for 50, 100, 250, and 500 ppm PEO solutions are measured to be  $2.08 \times 10^{-3}$ ,  $2.18 \times 10^{-3}$ ,  $2.46 \times 10^{-3}$ , and  $3.12 \times 10^{-3} \text{ Pa}\cdot\text{s}$ , respectively. The viscosity of the Newtonian medium, i.e., 0.0 wt% case in the table, is  $2.05 \times 10^{-3} \text{ Pa}\cdot\text{s}$ .

**SI Movie 1. Three-dimensional Elasto-Inertial particle focusing**

The particle (diameter = 5.9  $\mu\text{m}$ ) is dispersed in PEO 0.05wt%. Flow rate is tuned from 0.01-0.64ml/hr (refer to the labels inserted in the movie for flow conditions). Images were captured at 2000 frames per second (fps) with x10 objective and high speed CCD (Photron, MC2) mounted on the inverted microscope (Olympus, IX71) and the movie is played at 30 fps for all flow rates

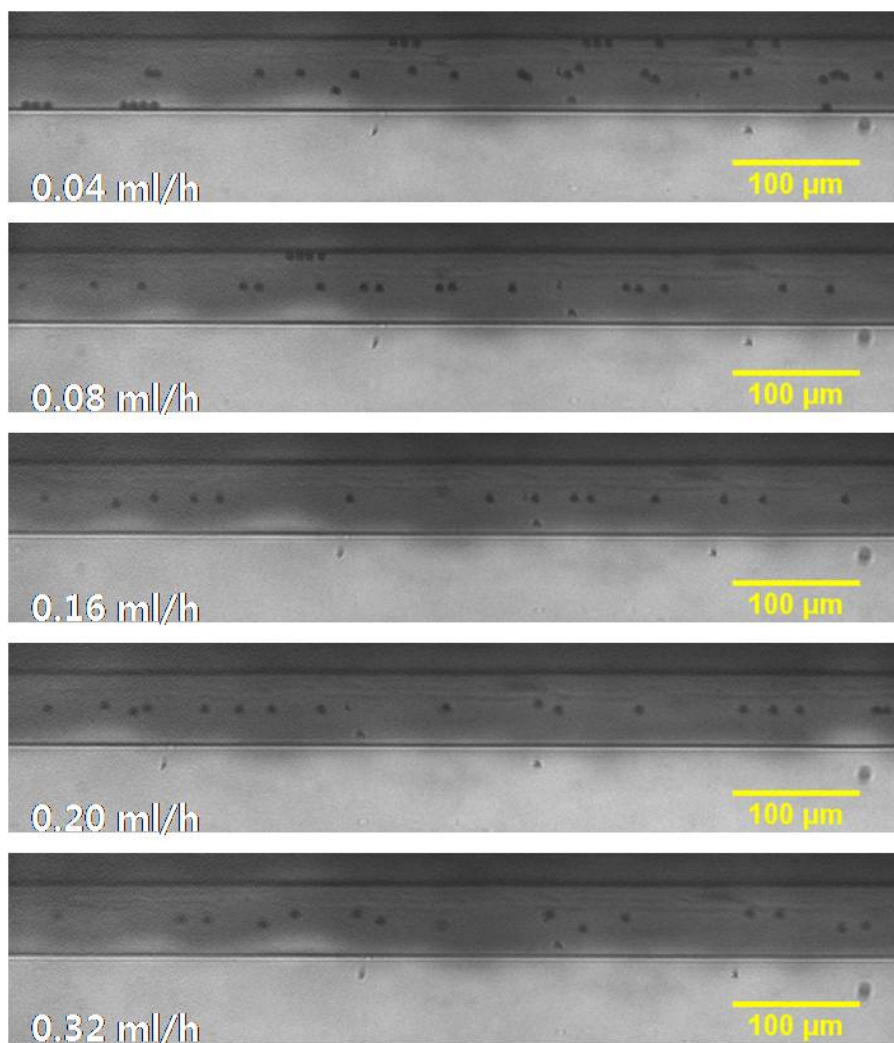

SI Fig. S1

Yang *et al.*

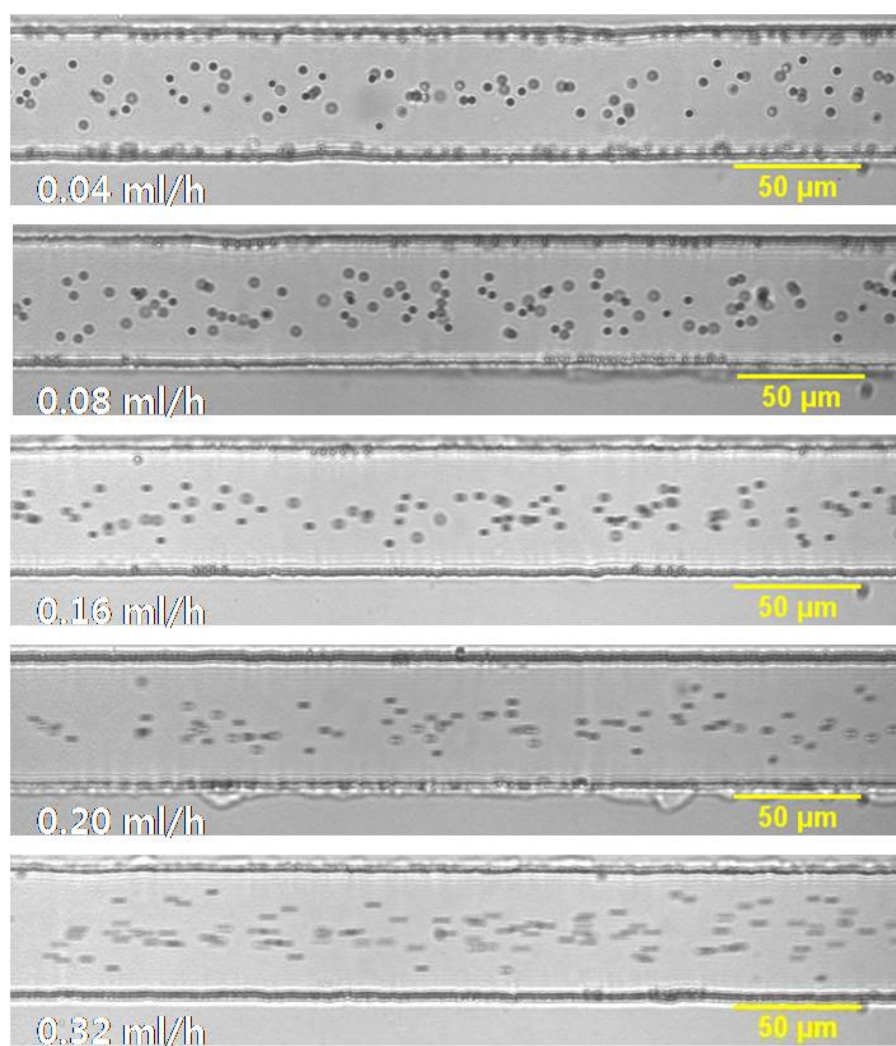

SI Fig. S2

Yang *et al.*

| Flow rate<br>(ml/h) | Concentration of PVP |                       |
|---------------------|----------------------|-----------------------|
|                     | 8wt%                 |                       |
|                     | $E1=258$             |                       |
|                     | $Wi$                 | $Re$                  |
| 0.01                | 0.10                 | $4.00 \times 10^{-4}$ |
| 0.02                | 0.20                 | $7.90 \times 10^{-4}$ |
| 0.04                | 0.41                 | $1.59 \times 10^{-3}$ |
| 0.08                | 0.82                 | $3.17 \times 10^{-3}$ |
| 0.16                | 1.64                 | $6.35 \times 10^{-3}$ |
| 0.20                | 2.04                 | $7.94 \times 10^{-3}$ |
| 0.24                | 2.45                 | $9.52 \times 10^{-3}$ |
| 0.32                | 3.27                 | $1.27 \times 10^{-2}$ |

| Flow rate<br>(ml/h) | Concentration of PEO |           |                 |           |                 |           |                  |           |                  |           |
|---------------------|----------------------|-----------|-----------------|-----------|-----------------|-----------|------------------|-----------|------------------|-----------|
|                     | 0.0wt%               |           | 0.005wt%        |           | 0.010wt%        |           | 0.025wt%         |           | 0.050wt%         |           |
|                     | <i>El</i> =0         |           | <i>El</i> =3.21 |           | <i>El</i> =5.28 |           | <i>El</i> =10.81 |           | <i>El</i> =21.51 |           |
|                     | <i>Wi</i>            | <i>Re</i> | <i>Wi</i>       | <i>Re</i> | <i>Wi</i>       | <i>Re</i> | <i>Wi</i>        | <i>Re</i> | <i>Wi</i>        | <i>Re</i> |
| 0.01                | 0.00                 | 0.03      | 0.09            | 0.03      | 0.14            | 0.03      | 0.26             | 0.02      | 0.40             | 0.02      |
| 0.02                | 0.00                 | 0.06      | 0.18            | 0.06      | 0.28            | 0.05      | 0.51             | 0.05      | 0.80             | 0.04      |
| 0.04                | 0.00                 | 0.11      | 0.36            | 0.11      | 0.57            | 0.11      | 1.03             | 0.09      | 1.61             | 0.07      |
| 0.08                | 0.00                 | 0.23      | 0.72            | 0.22      | 1.13            | 0.21      | 2.05             | 0.19      | 3.22             | 0.15      |
| 0.16                | 0.00                 | 0.46      | 1.44            | 0.45      | 2.26            | 0.43      | 4.10             | 0.38      | 6.43             | 0.30      |
| 0.20                | 0.00                 | 0.57      | 1.80            | 0.56      | 2.83            | 0.54      | 5.13             | 0.47      | 8.04             | 0.37      |
| 0.24                | 0.00                 | 0.68      | 2.16            | 0.67      | 3.39            | 0.64      | 6.15             | 0.57      | 9.65             | 0.45      |
| 0.32                | 0.00                 | 0.91      | 2.88            | 0.90      | 4.52            | 0.86      | 8.20             | 0.76      | 12.87            | 0.60      |
| 0.64                | 0.00                 | 1.82      | 5.76            | 1.79      | 9.04            | 1.71      | 16.40            | 1.52      | 25.74            | 1.20      |
| 1.28                | 0.00                 | 3.64      | 11.52           | 3.59      | 18.08           | 3.43      | 32.80            | 3.04      | 51.47            | 2.39      |
| 2.56                | 0.00                 | 7.28      | 23.05           | 7.18      | 36.16           | 6.85      | 65.60            | 6.07      | 102.94           | 4.79      |
